# Supplementary material
Source: Royal Society of Chemistry journal article supplement (doi:10.1039/d6ta02961b)
Supplement: d6ta02961b1.pdf [file d6ta02961b1.pdf]

## Supporting Information

# Morphology-Controlled Monolithic SrTiO<sub>3</sub>/Ti Nanocatalysts with Dispersed Rh Single Atoms and Clusters for Highly Selective Photocatalytic CO<sub>2</sub> Reduction to CH<sub>4</sub>

Mingjun Liu<sup>a,b</sup>, Wenduo Yang<sup>a,b</sup>, Jinrui Gao<sup>a,b</sup>, Tongxiang Chen<sup>a,b</sup>, Haijin Zhang<sup>a,b</sup>,  
*Renat Beissenov*,<sup>c</sup> Zhaolin Na<sup>a,b</sup>, Jing Li<sup>a,b,\*</sup> and Baodan Liu<sup>a,b,\*</sup>

<sup>a</sup> School of Materials Science and Engineering, Northeastern University, No.11, Wenhua Road, Shenyang, 110819, China

<sup>b</sup> Foshan Graduate School of Innovation, Northeastern University, No. 2, Zhihui Road, Shunde District, Foshan, 528300, China

<sup>c</sup> Kazakh-British Technical University, Tole Bi Street 59, Almaty, 050000, Kazakhstan

\* Corresponding Author: [lijing1@mail.neu.edu.cn](mailto:lijing1@mail.neu.edu.cn); [baodanliu@hotmail.com](mailto:baodanliu@hotmail.com)

## Figures

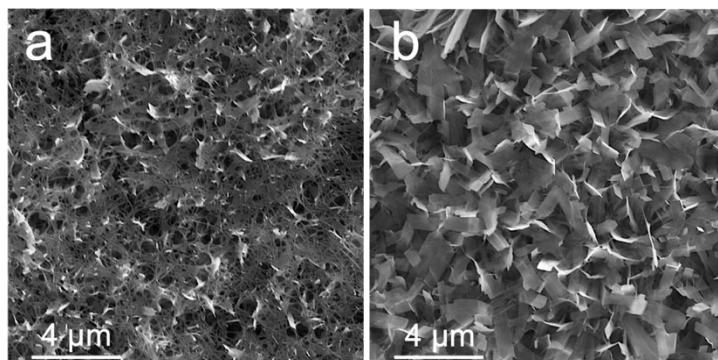

**Fig. S1.** SEM images of the  $\text{Na}_2\text{Ti}_2\text{O}_5$  precursors for  $\text{SrTiO}_3$  samples with different morphologies:

(a) nanowires; (b) nanosheets.

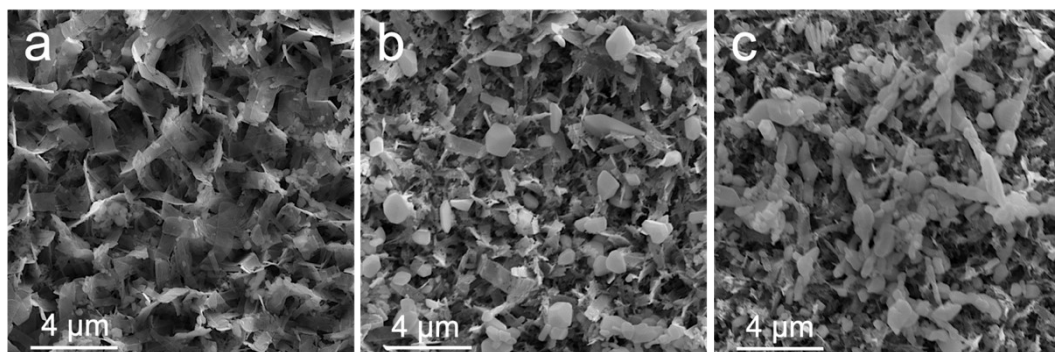

**Fig. S2.** SEM images of SrTiO<sub>3</sub>/Ti samples obtained with different secondary hydrothermal reaction times: (a) 2 h; (b) 4 h; (c) 8 h.

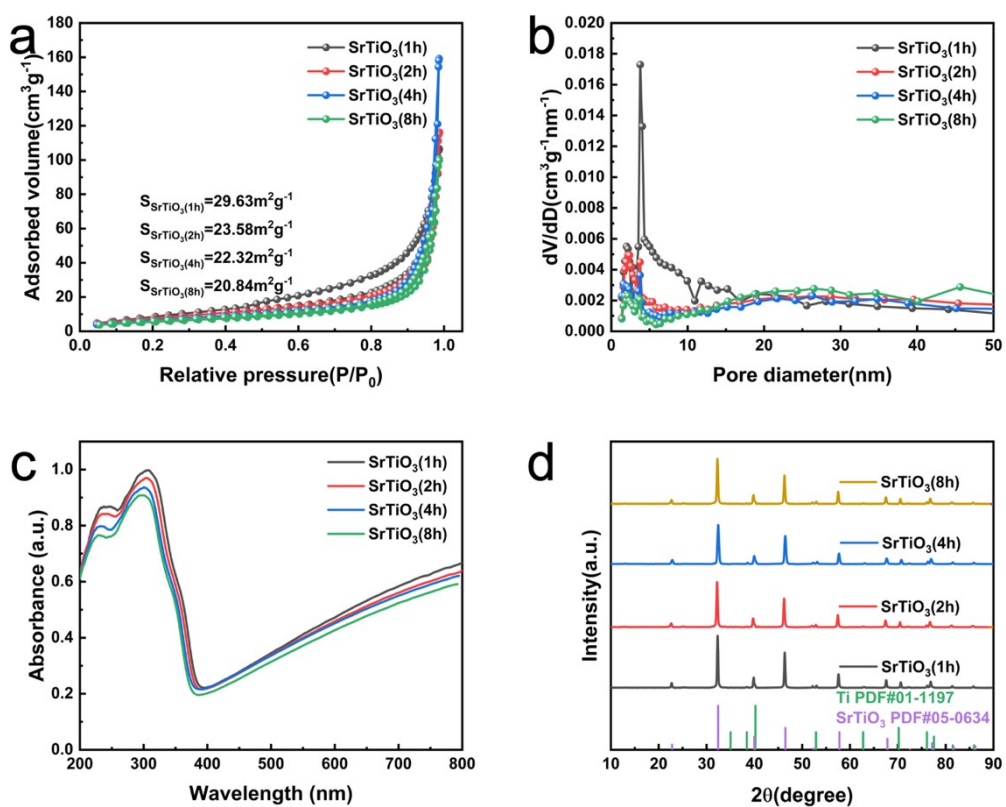

**Fig. S3.** Structural and optical characterization of SrTiO<sub>3</sub>/Ti samples prepared with different secondary hydrothermal durations (1, 2, 4, and 8 h): (a) N<sub>2</sub> adsorption–desorption isotherms; (b) pore size distribution curves; (c) UV–vis diffuse reflectance spectra; (d) XRD patterns.

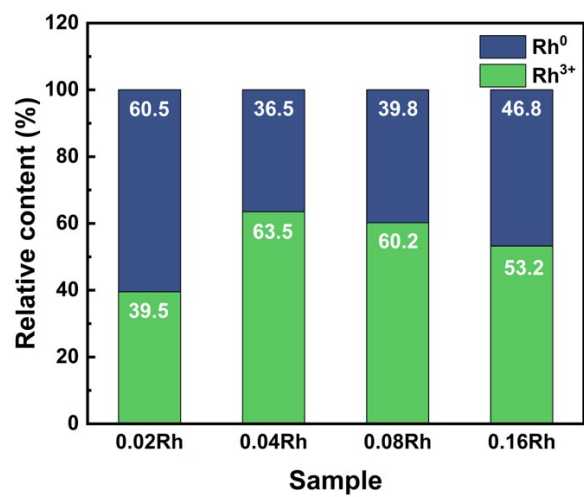

**Fig. S4.** Relative atomic contents of Rh<sup>3+</sup> and Rh<sup>0</sup> in xRh/SrTiO<sub>3</sub>/Ti samples with different Rh loadings.

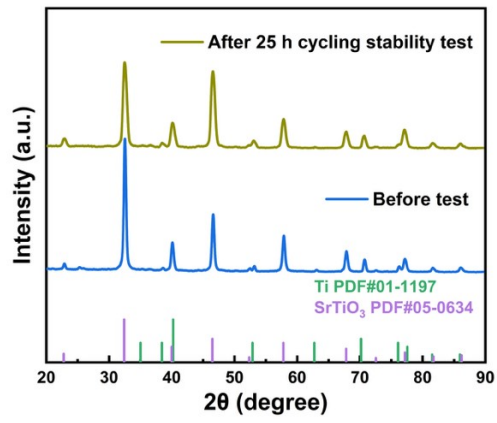

**Fig. S5.** XRD pattern of the 0.04Rh/SrTiO<sub>3</sub>/Ti sample before test and after 25 h cycling stability test.

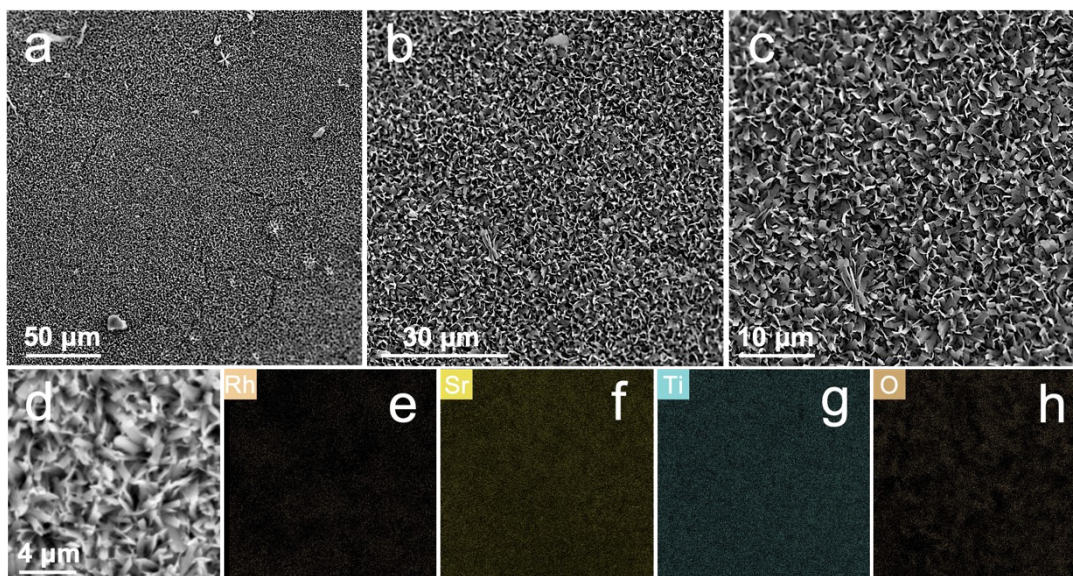

**Fig. S6.** SEM images and EDS elemental mapping images of 0.04Rh/SrTiO<sub>3</sub>/Ti after 25 h of photocatalytic cycling stability test: (a-c) SEM images and (d-h) EDS elemental mappings.

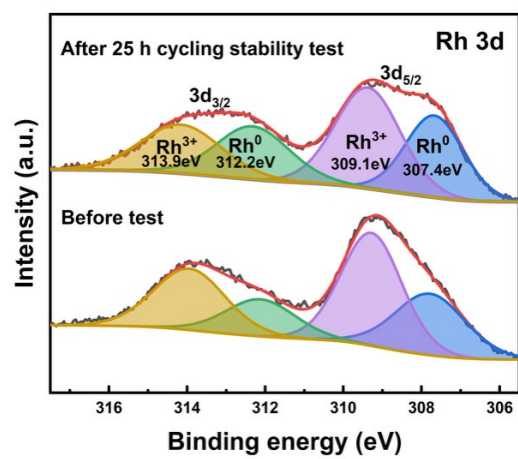

**Fig. S7.** XPS spectra of the 0.04Rh/SrTiO<sub>3</sub>/Ti sample before test and after 25 h of cycling stability test.

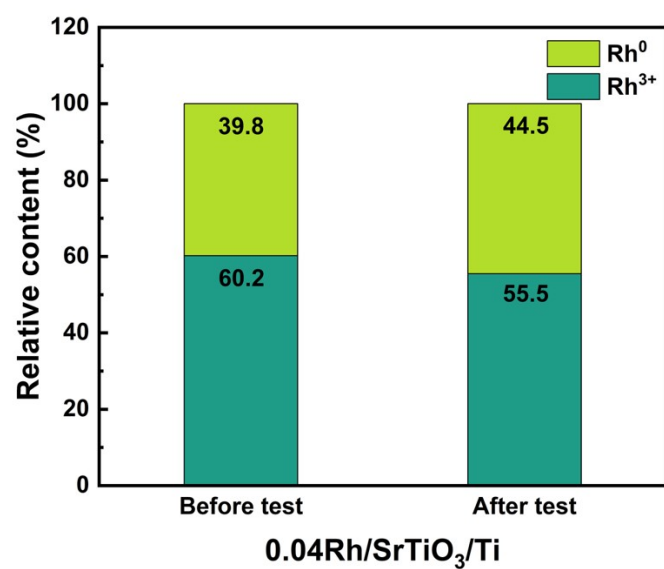

**Fig. S8.** Relative atomic contents of Rh<sup>3+</sup> and Rh<sup>0</sup> of the 0.04Rh/SrTiO<sub>3</sub>/Ti sample before test and after 25 h of cycling stability test.

**Table S1.** Elemental contents of Rh, Sr and Ti in 0.04Rh/SrTiO<sub>3</sub>/Ti sample determined by ICP-MS.

| <b>Element</b>            | <b>Rh</b>     | <b>Sr</b>      | <b>Ti</b>      |
|---------------------------|---------------|----------------|----------------|
| <b>Content<br/>(wt.%)</b> | <b>0.0941</b> | <b>40.3386</b> | <b>24.2597</b> |

**Table S2.** Comparison of CH<sub>4</sub> production rates and selectivity for CO<sub>2</sub> photoreduction over SrTiO<sub>3</sub>-based photocatalysts and previously reported catalysts in recent years.

| Catalysts                                                                              | Reaction conditions                                                                        | Light sources                                      | CH <sub>4</sub> Yield (μmol·g <sup>-1</sup> ·h <sup>-1</sup> ) | CH <sub>4</sub> Selectivity (%) | refs |
|----------------------------------------------------------------------------------------|--------------------------------------------------------------------------------------------|----------------------------------------------------|----------------------------------------------------------------|---------------------------------|------|
| Pt/SrTiO <sub>3</sub>                                                                  | CO <sub>2</sub> gas (1 atm ) and 0.4 mL H <sub>2</sub> O, >125 °C                          | 300 W Xe-lamp                                      | 1.61                                                           | 100                             | 1    |
| C/TiO <sub>2</sub> /SrTiO <sub>3</sub>                                                 | CO <sub>2</sub> gas (100 kPa) and 150 mL H <sub>2</sub> O, 5°C                             | 300 W Xe-lamp and a 3 a.m. 1.5 G filter            | 35.9                                                           | 39.54                           | 2    |
| Bi-SrTiO <sub>3-x</sub>                                                                | 5 mg photocatalysts, CO <sub>2</sub> gas (0.1MPa) and 2 mL H <sub>2</sub> O                | 300 W Xe-lamp (λ > 420 nm) 200 mW·cm <sup>-2</sup> | 0.36                                                           | 6.06                            | 3    |
| SnS <sub>2</sub> /3DOM-SrTiO <sub>3</sub>                                              | CO <sub>2</sub> gas and 2 mL H <sub>2</sub> O                                              | 300 W Xe-lamp (λ > 420 nm), 80 mW·cm <sup>-2</sup> | 12.5                                                           | 74.9                            | 4    |
| Al/N-SrTiO <sub>3</sub>                                                                | CO <sub>2</sub> gas 50mL and 2mL H <sub>2</sub> O, 55°C                                    | 300 W Xe-lamp                                      | 0.81                                                           | 13.43                           | 5    |
| Bi <sub>2</sub> SiO <sub>5</sub> /SrTiO <sub>3</sub>                                   | 50 mg photocatalysts, high-purity CO <sub>2</sub> gas and saturated H <sub>2</sub> O steam | 300 W Xe-lamp                                      | 6.58                                                           | 13.43                           | 6    |
| TiO <sub>2</sub> /SrTiO <sub>3</sub>                                                   | 5 mg photocatalysts, CO <sub>2</sub> gas (1 atm ) and 10 mL H <sub>2</sub> O, 30°C         | 300 W Xe-lamp (320<λ<780 nm)                       | 0.65                                                           | 1.91                            | 7    |
| Pt/Cu/TiO <sub>2</sub>                                                                 | 20 mg photocatalysts, CO <sub>2</sub> and H <sub>2</sub> O vapor                           | 300 W Xe-lamp(300 nm < λ < 400 nm)                 | 2.5                                                            | 100                             | 8    |
| Sr <sub>0.8</sub> Bi <sub>0.2</sub> Ti <sub>0.8</sub> Mn <sub>0.2</sub> O <sub>3</sub> | 20 mg photocatalysts, CO <sub>2</sub> gas (1.5 atm ) and 2 mL H <sub>2</sub> O, 75°C       | 300 W Xe-lamp 200 mW·cm <sup>-2</sup>              | 30.6                                                           | 84.3                            | 9    |
| TiO <sub>2</sub> -V <sub>Ti</sub> -V <sub>O</sub>                                      | 10 mg photocatalysts, pure                                                                 | 300 W Xe-lamp                                      | 19.4                                                           | 100                             | 10   |

| Catalysts                                                  | Reaction conditions                                                    | Light sources | CH <sub>4</sub> Yield (μmol·g <sup>-1</sup> ·h <sup>-1</sup> ) | CH <sub>4</sub> Selectivity (%) | refs          |
|------------------------------------------------------------|------------------------------------------------------------------------|---------------|----------------------------------------------------------------|---------------------------------|---------------|
|                                                            | CO <sub>2</sub> with H <sub>2</sub> O vapor( 101 kPa), 20°C            |               |                                                                |                                 |               |
| g-C <sub>3</sub> N <sub>4</sub> / La-Rh-SrTiO <sub>3</sub> | 50 mg photocatalysts, pure CO <sub>2</sub> with H <sub>2</sub> O vapor | 300 W Xe-lamp | 1.8                                                            | 30.51                           | <sup>11</sup> |
| Rh/SrTiO <sub>3</sub> /Ti                                  | CO <sub>2</sub> gas (80 kPa) and 1mL H <sub>2</sub> O, 30°C            | 300 W Xe-lamp | 35.62                                                          | 100                             | This work     |

## References

1. L. Lu, X. He, X. Zhu, C. Lv, Z. Liu, L. Pei, S. Yan and Z. Zou, *Inorg Chem*, 2024, 63, 13295-13303.
2. Q. S. Wang, Y. C. Yuan, C. F. Li, Z.-r. Zhang, C. Xia, W.-g. Pan, L. Liu and R.-t. Guo, *Renewable Energy*, 2024, 231, 120997.
3. L. Pan, H. Mei, G. Zhu, S. Li, X. Xie, S. Gong, H. Liu, Z. Jin, J. Gao, L. Cheng and L. Zhang, *Journal of Colloid and Interface Science*, 2022, 611, 137-148.
4. W. He, X. Wu, Y. Li, J. Xiong, Z. Tang, Y. Wei, Z. Zhao, X. Zhang and J. Liu, *Chinese Chemical Letters*, 2020, 31, 2774-2778.
5. W. Wang, W. Kang, J. Niu, H. Jian, Q. Shen and J. Xue, *J Colloid Interface Sci*, 2025, 689, 137266.
6. T. T. Han, Y. Guo, M. A. Mushtaq and Y. Jia, *J Environ Chem Eng*, 2025, 13, 117604.
7. S. Jiang, K. Zhao, M. Al Mamun, Y. L. Zhong, P. Liu, H. Yin, L. Jiang, S. Lowe, J. Qi and R. Yu, *Inorg Chem Front*, 2019, 6, 1667-1674.
8. J. Wang, Y. Li, J. Zhao, Z. Xiong, Y. Zhao and J. Zhang, *Catalysis Science & Technology*, 2022, 12, 3454-3463.
9. Y. Gao, M. Zhang, Y. Jin, Y. Mao, W. Wang and Z. Song, *ACS Catalysis*, 2024, 14, 10746-10759.
10. Y. He, S. Dai, J. P. Sheng, Q. Ren, Y. Lv, Y. Sun and F. Dong, *Proceedings of the National Academy of Sciences*, 2024, 121, e2322107121.
11. S. J. Wan, Y. T. Hou, W. Wang, G. Q. Luo, C.-B. Wang, R. Tu and S.-W. Cao, *Rare Met*, 2024, 43, 5880-5890.
